# Supplementary material for: Elastic anisotropy of mechanically responsive molecular solids
Source: Royal Society of Chemistry journal article supplement (doi:10.1039/d1ce00542a), 2021-01-01

## Elastic Anisotropy of Mechanically Responsive Molecular Solids

Dherya Bahl, Beth A. Young, and Lewis L. Stevens\*

| Material     | $\nu_{L,max}$<br>(GHz) | $\nu_{L,peak}$<br>(GHz) | $A^{BLS}$ | $A^U$ | $A^L$ |
|--------------|------------------------|-------------------------|-----------|-------|-------|
| Acenaphthene | 22.45                  | 19.54                   | 1.149     | 0.740 | 0.265 |
| Adamantane   | 18.87                  | 16.78                   | 1.125     | 0.880 | 0.316 |
| Anthracene   | 25.89                  | 18.85                   | 1.373     | 5.967 | 1.669 |

*Department of Pharmaceutical Sciences and Experimental Therapeutics, College of Pharmacy,  
The University of Iowa, Iowa City, IA 52242*

| Material                          | Density<br>(g/mL) | Refractive<br>index |
|-----------------------------------|-------------------|---------------------|
| Acenaphthene                      | 1.15              | 1.69                |
| Adamantane                        | 1.07              | 1.57                |
| Anthracene                        | 1.25              | 1.89                |
| Aspirin                           | 1.40              | 1.55                |
| Benzophenone                      | 1.11              | 1.61                |
| Biphenyl                          | 1.00              | 1.57                |
| Carbamazepine                     | 1.25              | 1.75                |
| Citric acid                       | 1.67              | 1.58                |
| Diphenyl sulfone                  | 1.20              | 1.59                |
| Hippuric acid                     | 1.37              | 1.57                |
| 4-<br>methylbenzophenone          | 1.07              | 1.58                |
| Naphthalene                       | 1.16              | 1.72                |
| Resorcinol                        | 1.28              | 1.58                |
| Succinimide                       | 1.41              | 1.48                |
| 1,2,4,5-<br>tetramethylbenzene    | 0.89              | 1.48                |
| 1,3,5-<br>trichlorobenzene        | 1.46              | 1.57                |
| Thiourea                          | 1.41              | 1.65                |
| Trans-stilbene                    | 0.97              | 1.63                |
| Urotropine                        | 1.34              | 1.59                |
| Maleic acid                       | 1.59              | 1.51                |
| Urea                              | 1.32              | 1.40                |
| Melamine                          | 1.57              | 1.87                |
| 2-methyl-1,3-<br>cyclohexanedione | 1.31              | 1.46                |
| Succinic acid                     | 1.57              | 1.45                |

### SUPPORTING INFORMATION

**Table S1.** Density and refractive index data for our validation set of materials.

|                                      |                             |                            |       |        |       |
|--------------------------------------|-----------------------------|----------------------------|-------|--------|-------|
| <b>Aspirin</b>                       | 17.66                       | 16.85                      | 1.048 | 0.697  | 0.245 |
| <b>Benzophenone</b>                  | 20.39                       | 17.20                      | 1.185 | 0.760  | 0.285 |
| <b>Biphenyl</b>                      | 20.52                       | 17.20                      | 1.193 | 2.540  | 0.822 |
| <b>Carbamazepine</b>                 | $V_{\max}^{23.86} (C_{ij})$ | $V_{\max}^{19.12} (p-BLS)$ | 1.246 | 3.233  | 0.981 |
| <b>Citric acid</b>                   | 24.63                       | 20.22                      | 1.219 | 2.010  | 0.685 |
| <b>Diphenyl sulfone</b>              | 20.52                       | 16.92                      | 1.213 | 4.330  | 1.238 |
| <b>Hippuric acid</b>                 | 23.00                       | 19.12                      | 1.203 | 3.480  | 1.040 |
| <b>4-methylbenzophenone</b>          | 19.97                       | 18.16                      | 1.100 | 2.470  | 0.786 |
| <b>Naphthalene</b>                   | 24.79                       | 17.21                      | 1.440 | 12.550 | 2.565 |
| <b>Resorcinol</b>                    | 21.07                       | 19.75                      | 1.067 | 1.190  | 0.685 |
| <b>Succinimide</b>                   | 18.83                       | 17.89                      | 1.053 | 1.430  | 0.536 |
| <b>1,2,4,5-tetramethylbenzene</b>    | 22.04                       | 17.47                      | 1.262 | 4.690  | 1.317 |
| <b>1,3,5-trichlorobenzene</b>        | 17.35                       | 14.58                      | 1.190 | 0.330  | 0.123 |
| <b>Thiourea</b>                      | 27.30                       | 18.98                      | 1.438 | 8.250  | 1.966 |
| <b>Trans-stilbene</b>                | 22.72                       | 19.40                      | 1.171 | 2.430  | 0.775 |
| <b>Urotropine</b>                    | 20.80                       | 21.12                      | 0.985 | 0.030  | 0.014 |
| <b>Maleic acid</b>                   | 31.94                       | 16.23                      | 1.968 | 37.220 | 4.499 |
| <b>Urea</b>                          | 33.59                       | 21.74                      | 1.545 | 11.900 | 3.052 |
| <b>Melamine</b>                      | 38.68                       | 26.69                      | 1.449 | 3.230  | 1.058 |
| <b>2-methyl-1,3-cyclohexanedione</b> | 36.04                       | 18.85                      | 1.912 | 8.190  | 2.008 |
| <b>Succinic acid</b>                 | 47.96                       | 17.89                      | 2.681 | 12.830 | 2.704 |

**Table S2.** Our characteristic frequencies –  $v_{L,\max}$  and  $v_{L,\text{peak}}$  – for determining elastic anisotropy using p-BLS ( $A^{\text{BLS}}$ ). The calculated EAIs from Ranganathan et al. ( $A^{\text{U}}$ ) and Kube ( $A^{\text{L}}$ ).

**Table S3.** Maximum longitudinal sound velocities calculated

|                                      |      |      |
|--------------------------------------|------|------|
| <b>Acenaphthene</b>                  | 3454 | 3534 |
| <b>Adamantane</b>                    | 2834 | 3201 |
| <b>Anthracene</b>                    | 3789 | 3644 |
| <b>Aspirin</b>                       | 3200 | 3031 |
| <b>Benzophenone</b>                  | 3264 | 3373 |
| <b>Biphenyl</b>                      | 3948 | 3474 |
| <b>Carbamazepine</b>                 | 3029 | 3622 |
| <b>Citric acid</b>                   | 4159 | 4163 |
| <b>Diphenyl sulfone</b>              | 3439 | 3426 |
| <b>Hippuric acid</b>                 | 4174 | 3902 |
| <b>4-methylbenzophenone</b>          | 3495 | 3371 |
| <b>Naphthalene</b>                   | 3540 | 3834 |
| <b>Resorcinol</b>                    | 4747 | 3552 |
| <b>Succinimide</b>                   | 3314 | 3387 |
| <b>1,2,4,5-tetramethylbenzene</b>    | 4243 | 3964 |
| <b>1,3,5-trichlorobenzene</b>        | 2751 | 2947 |
| <b>Thiourea</b>                      | 4299 | 4390 |
| <b>Trans-stilbene</b>                | 3844 | 3716 |
| <b>Urotropine</b>                    | 6511 | 3477 |
| <b>Maleic acid</b>                   | 5883 | 5627 |
| <b>Urea</b>                          | 6388 | 6382 |
| <b>Melamine</b>                      | 5789 | 5496 |
| <b>2-methyl-1,3-cyclohexanedione</b> | 6202 | 6083 |
| <b>Succinic acid</b>                 | 8938 | 8798 |

**Figure S1.** Powder BLS spectra for all materials. Characteristic frequencies are shown by the dashed gray lines.

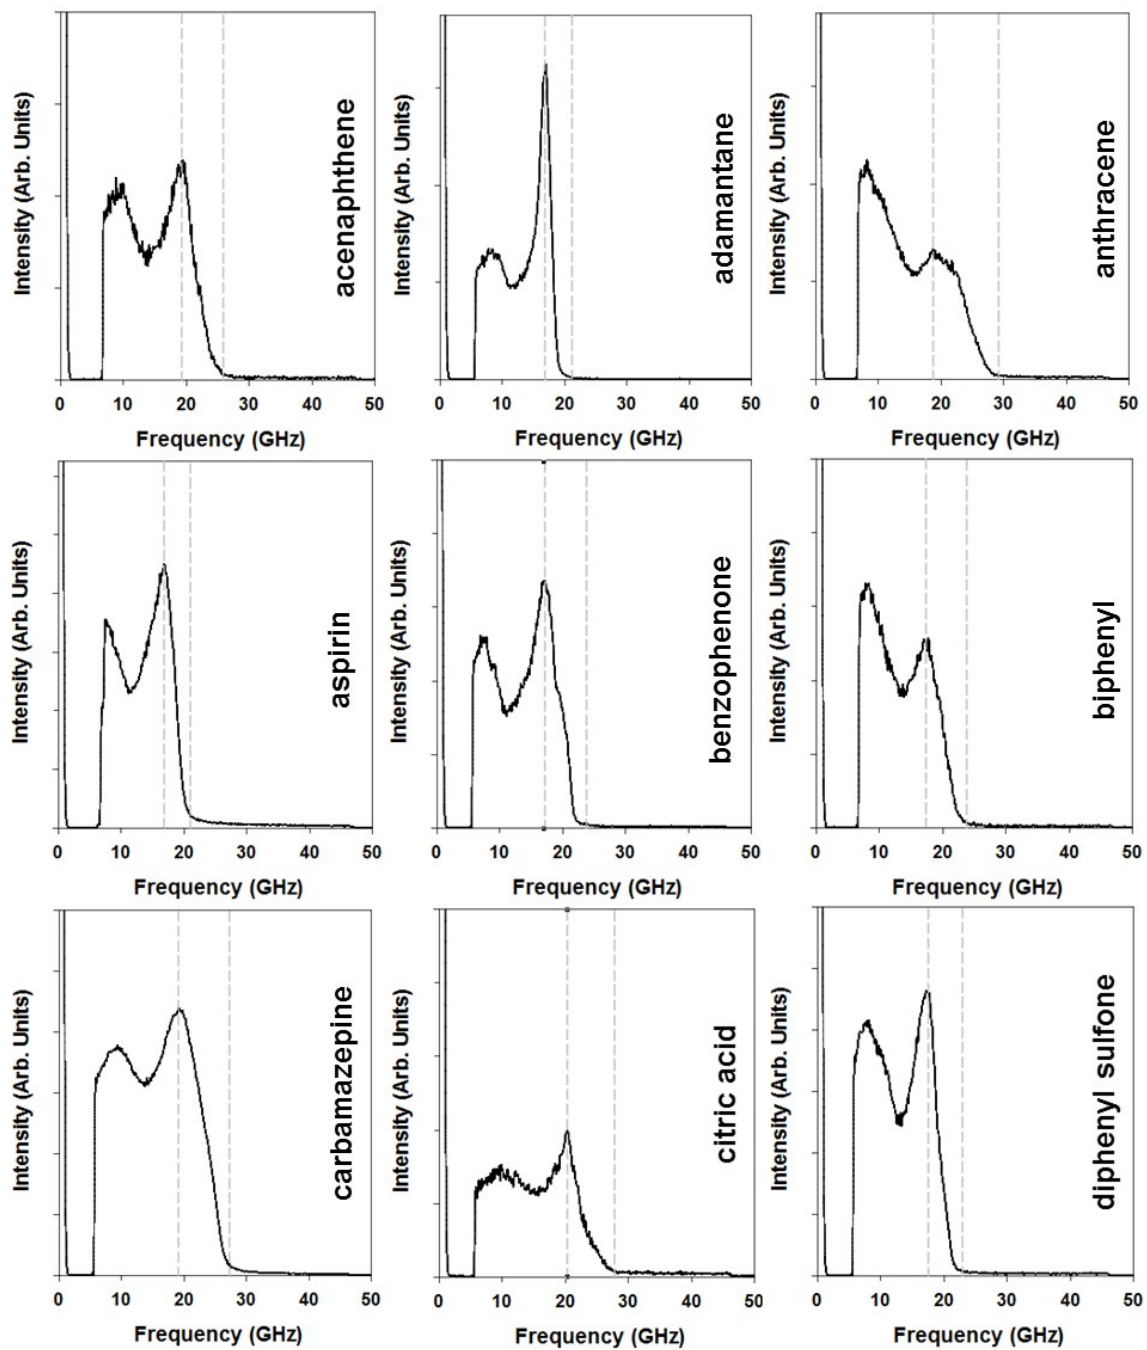

Figure S1 continued.

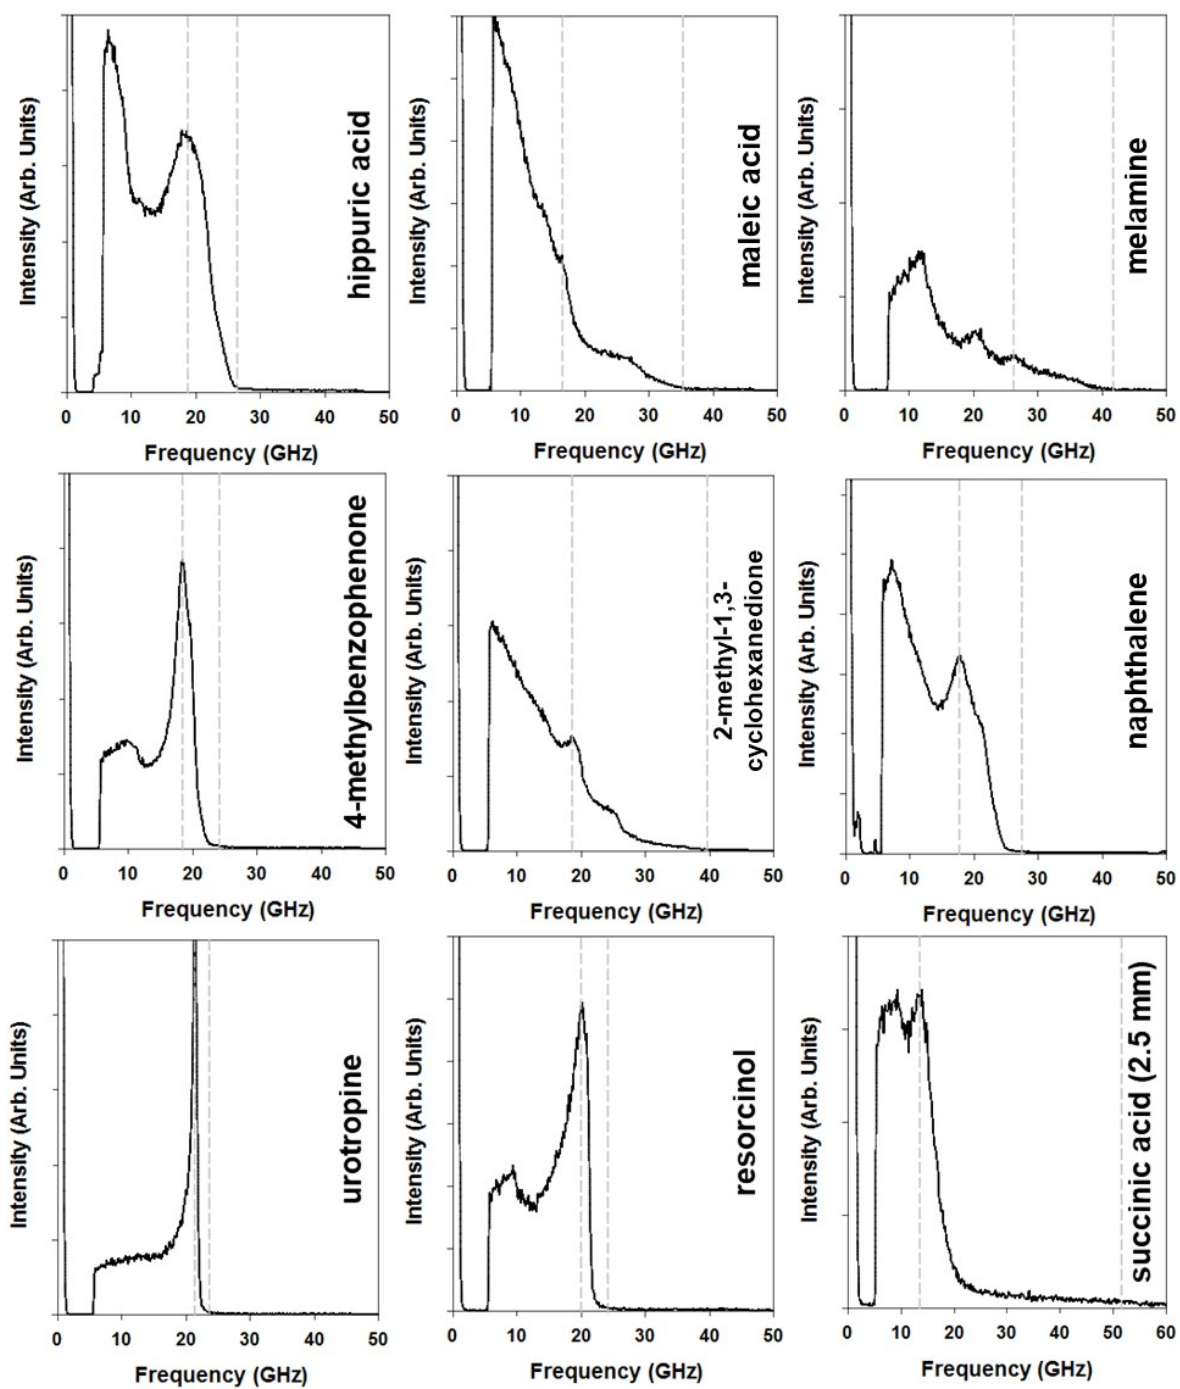

Figure S1 continued.

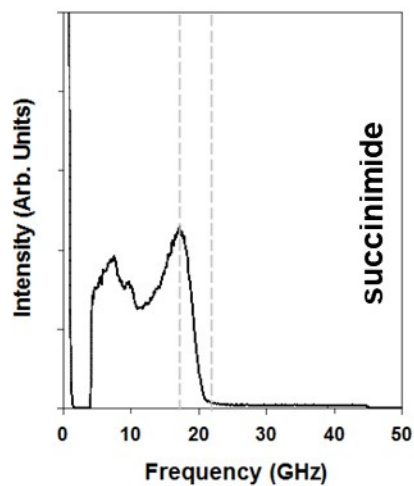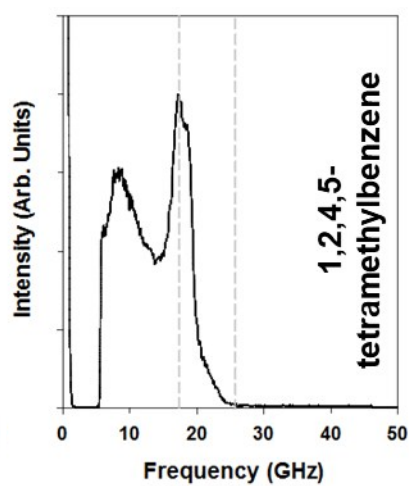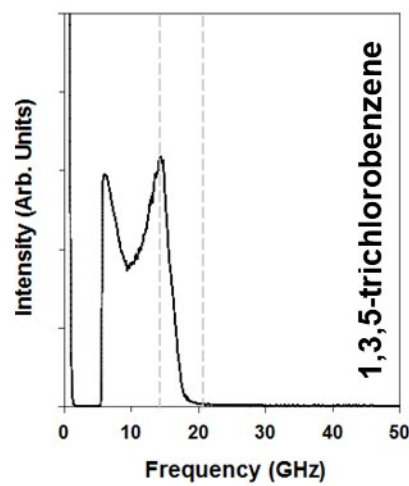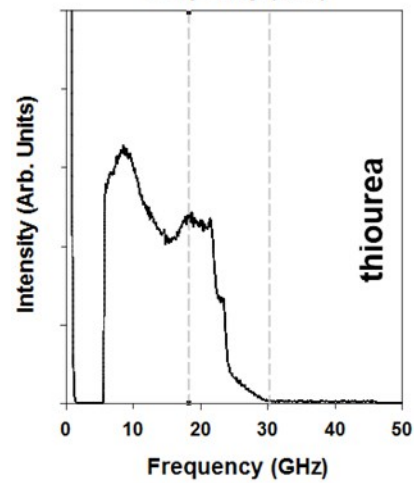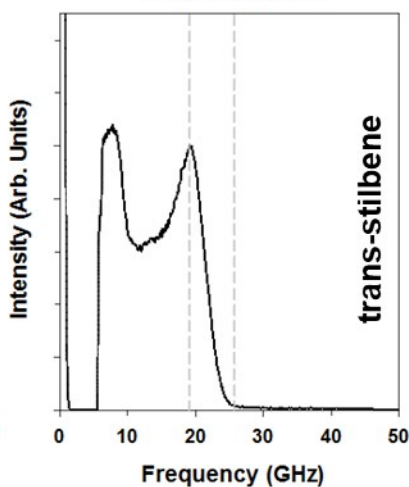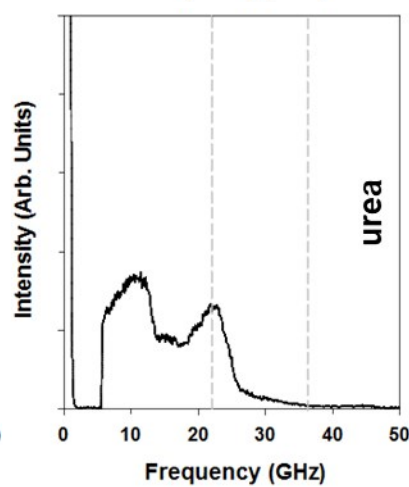

Supplement: d1ce00542a1.pdf [file d1ce00542a1.pdf]
